# Supplementary material for: Reduction in the Dietary VA Status Prevents Type 2 Diabetes and Obesity in Zucker Diabetic Fatty Rats
Source: MDPI journal article supplement (doi:10.3390/biom12040528), 2022-03-31
Supplement: s1 [file s1]

## Supplemental materials

**Table S1: Real-time PCR primer sequences of the indicated genes**

| Gene name       | Forward Sequence                 | Reverse Sequence             |
|-----------------|----------------------------------|------------------------------|
| <i>Gck</i>      | 5'-CCTGGGCTTCACCTTCTCCTT-3'      | 5'-GAGGCCTTGAAGCCCTTGGT-3'   |
| <i>Srebp-1c</i> | 5'-GGAGCCATGGATTGCACATT-3'       | 5'-AGGCCAGGGAAGTCACTGTCT-3'  |
| <i>Srebp-2</i>  | 5'-CTGCAGATCCCGCAGTACAG-3'       | 5'-GGTGGATGAGGGAGAGAAGGT-3'  |
| <i>Pck1</i>     | 5'-AGTCACCATCACTTCCTGGAAGA-3'    | 5'-GGTGCAGAATCGCGAGTTG-3'    |
| <i>Fas</i>      | 5'-CAGGAACTGAACGGCATTACCTC-3'    | 5'-CATTTTCTAGGGATAACAGCAC-3' |
| <i>Acl</i>      | 5'-GCTGAAGACATTAAGAGACACCTGTT-3' | 5'-AAATTGAATAGGCCGGAGATGA-3' |

*Gck*, glucokinase; *Srebp-1c*, Sterol regulatory element-binding protein 1; (*Srebp2*), Sterol regulatory element-binding protein 2; (*Pck1*), Phosphoenolpyruvate Carboxykinase 1; *Fas*, Fatty acid synthase; *Acl*, ATP citrate lyase.

**Table S2: Antibody sources and dilution folds**

| Protein name                                   | Catalog No. | Dilution fold | Manufacture                  |
|------------------------------------------------|-------------|---------------|------------------------------|
| Fatty acid synthase (FAS)                      | #3180S      | 1: 1000       | Cell Signaling Technology    |
| ATP citrate lyase (ACL)                        | #4332S      | 1: 1000       | Cell Signaling Technology    |
| Glucokinase (GCK)                              | #sc-7908    | 1: 500        | Santa Cruz Biotechnology Inc |
| Phosphoenolpyruvate carboxykinase (PEPCK-C)    | #10004943   | 1: 1000       | Cayman Chemical              |
| Insulin receptor $\beta$ subunit (IR $\beta$ ) | #610109     | 1: 1000       | BD Biosciences               |

|                                      |         |         |                           |
|--------------------------------------|---------|---------|---------------------------|
| $\beta$ -actin                       | #4970 s | 1: 1000 | Cell Signaling Technology |
| Anti-rabbit IgG, HRP-linked Antibody | #7074   | 1: 1000 |                           |

Note: Antibodies are diluted in TBST (10 mM Tris, 150 mM NaCl, 0.1% Tween 20, pH 7.5) containing 5% bovine serum albumin or 5% non-fat milk. All antibodies were used according to the manufacturer's instructions.
